# Supplementary material
Source: Springer Nature journal article supplement (https://www.springermedizin.de/resource/supplementary/40001_2013_103_MOESM4_ESM.pdf/9685268)

**A**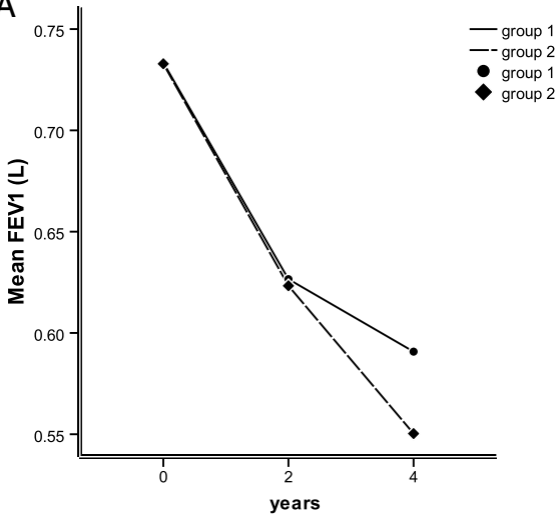**B**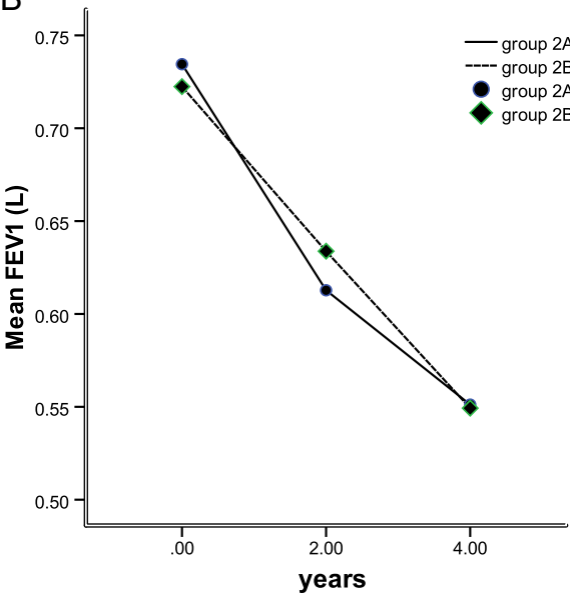

Supplement: MOESM4 [file 9685268]
